# Supplementary material
Source: ML conference proceedings conference paper supplement (https://openreview.net/forum?id=Brx4JDUo5ec)
Supplement: supplementary_material [file attachment]

Normalized number of centers

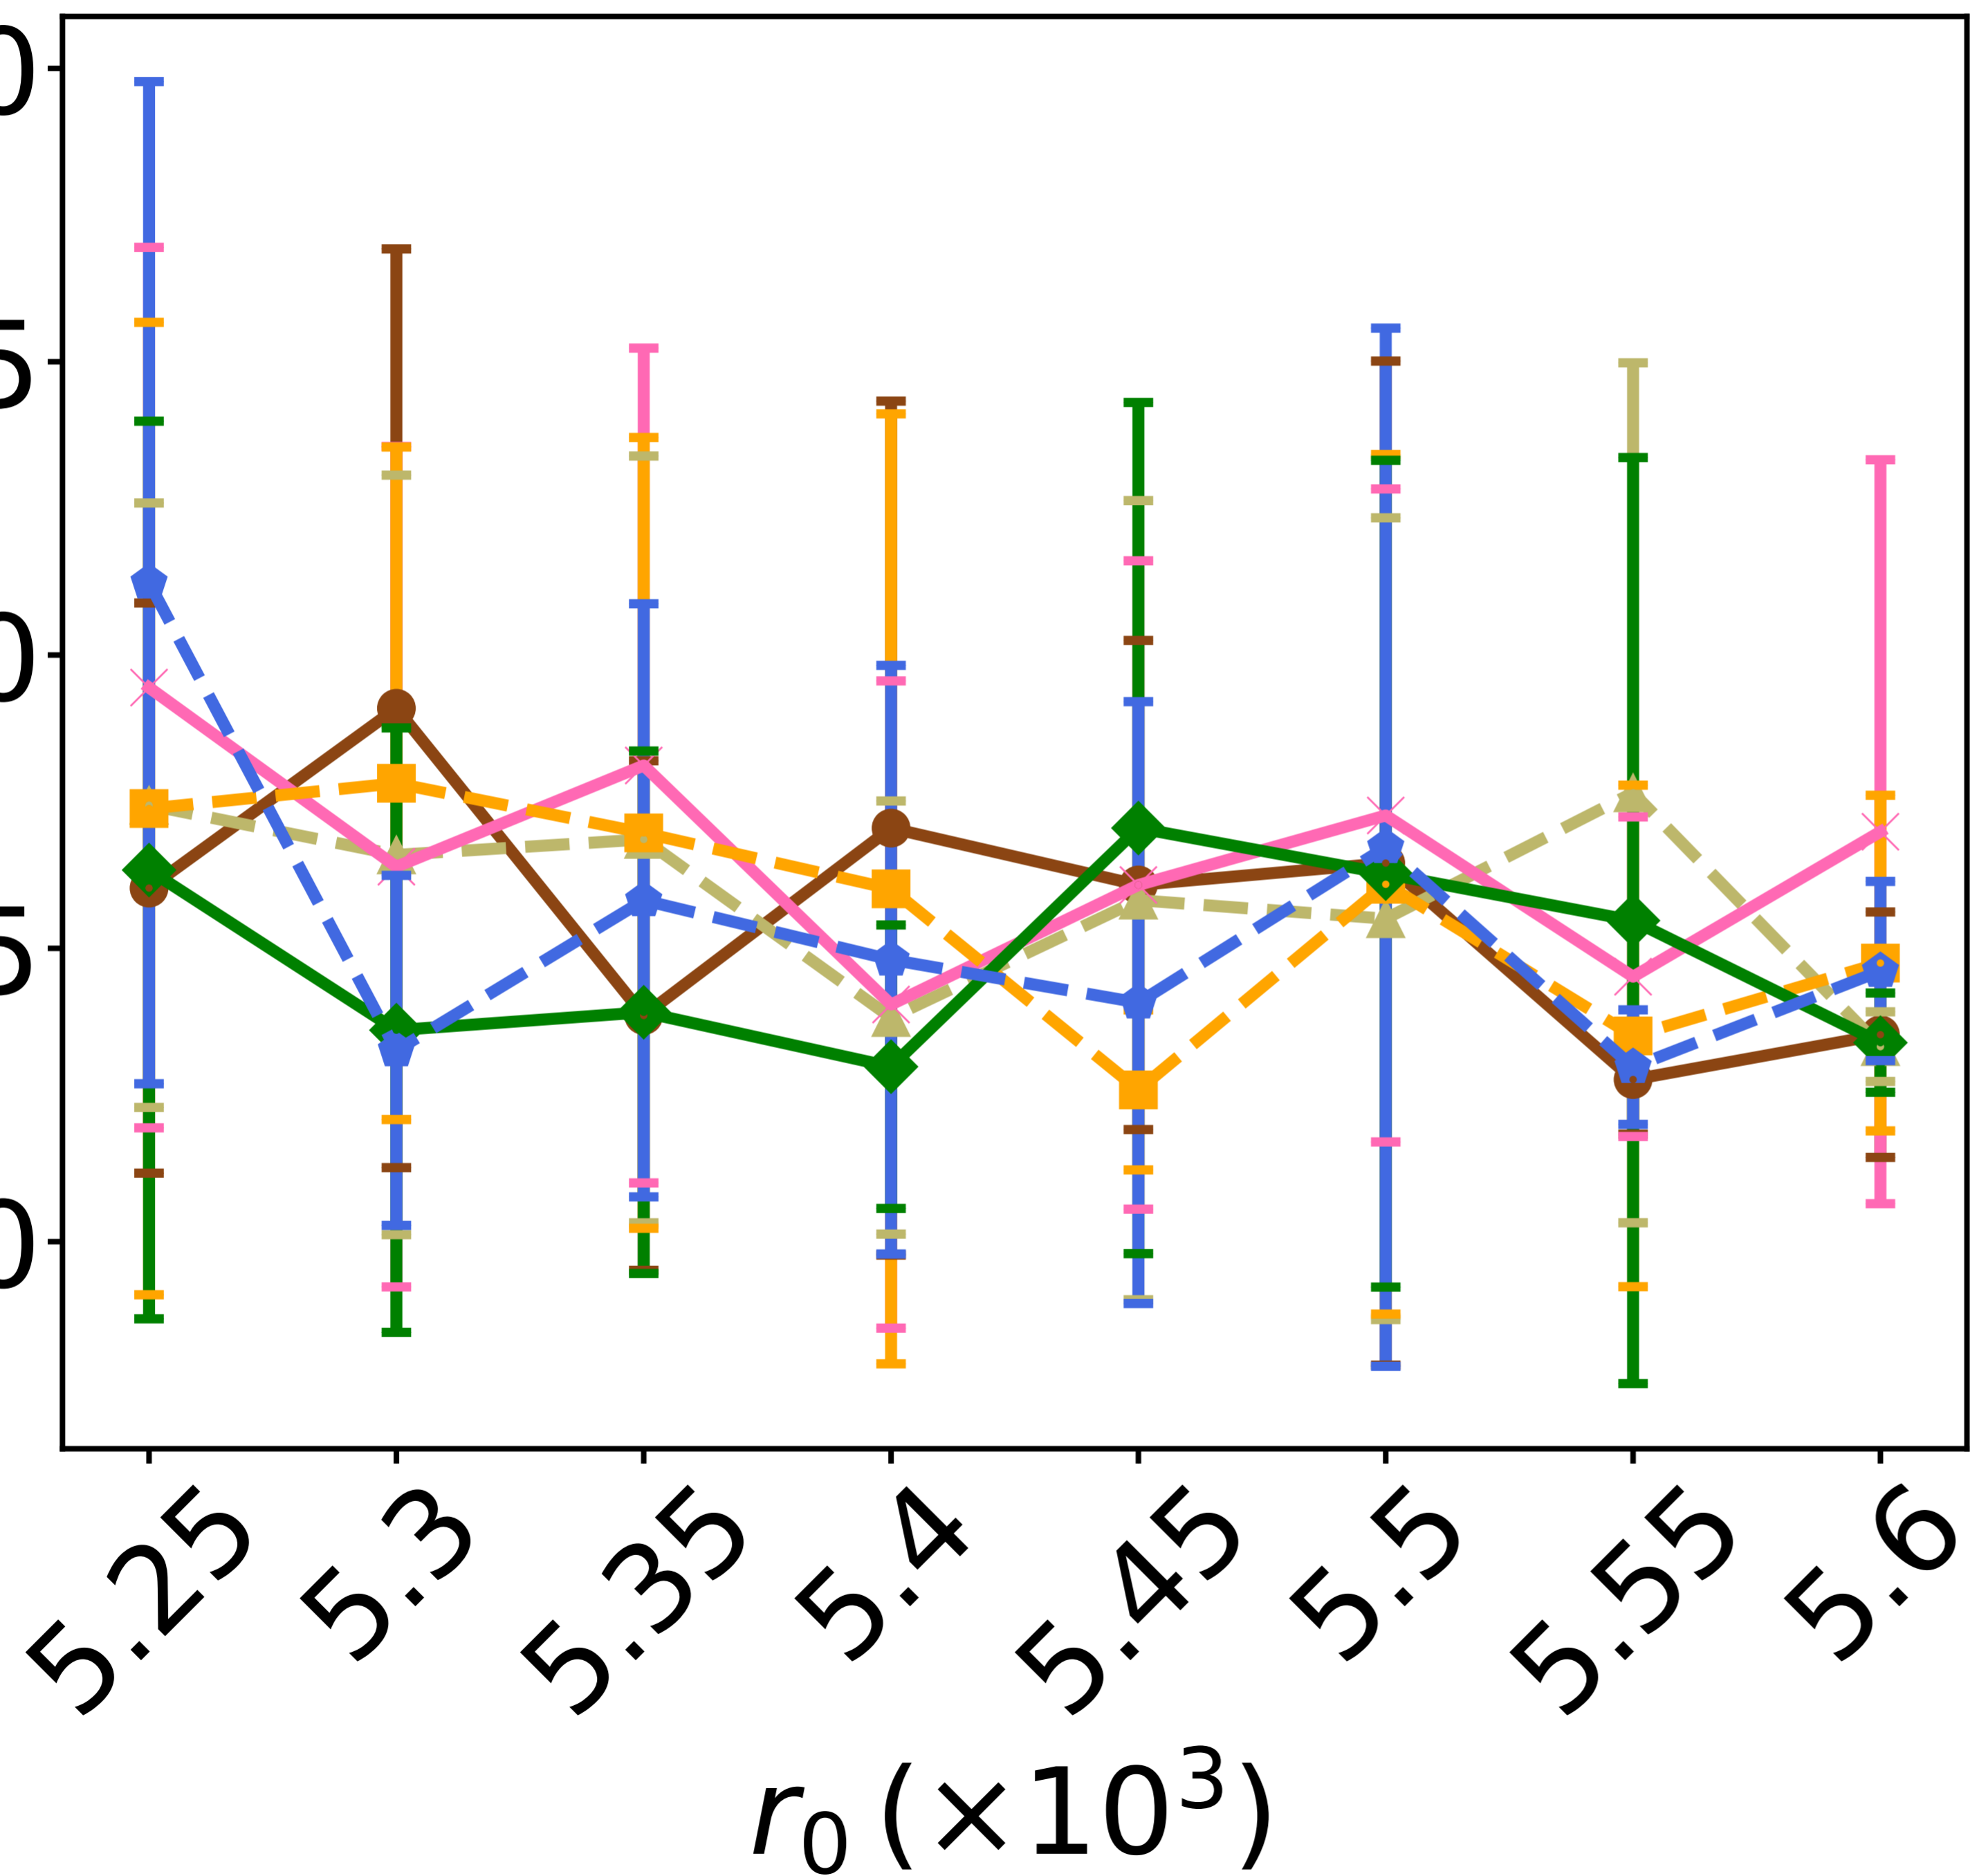

- Algorithm 2  $\varepsilon = 0.01, \eta = 0.1, k_0 = 2$
- Algorithm 2  $\varepsilon = 0.01, \eta = 0.1, k_0 = 4$
- Algorithm 2  $\varepsilon = 0.01, \eta = 0.1, k_0 = 6$
- Algorithm 2  $\varepsilon = 0.01, \eta = 0.15, k_0 = 2$
- Algorithm 2  $\varepsilon = 0.01, \eta = 0.15, k_0 = 4$
- Algorithm 2  $\varepsilon = 0.01, \eta = 0.15, k_0 = 6$
